# Supplementary material for: GSK-3β regulates the endothelial-to-mesenchymal transition via reciprocal crosstalk between NSCLC cells and HUVECs in multicellular tumor spheroid models
Source: PubMed Central journal article supplement (PMC6359813; doi:10.1186/s13046-019-1050-1), 2019-02-01

## **Supplementary Figure legends**

### **Supplementary Figure 1.**

NCI-H460 cells were cultured under 2D and 3D condition using the same number of cells with the same amount of media. After 3 days, the conditional media (CM) was mixed with HUVEC original media at indicated ratio and then treated HUVEC cells for 24 and 48 hr. Representative image of immunofluorescence staining for CD31 (green),  $\alpha$ -SMA (red), and nuclei (blue) in HUVEC cells.

### **Supplementary Figure 2.**

(A) Target names of spots in Human Growth Factor Antibody Array. (B) Human Growth Factor Antibody Array were used to measure the level of growth factor in samples from 2D and 3D co-cultured NCI-H460 with HUVEC.

### **Supplementary Figure 3**

Dose response curve for cell viability in NCI-H460 or A549 cells following treatment CHIR-99021 for 48 hr.

# Supplementary Figure 1

|                   |    |   |   |   |   |   |   |   |
|-------------------|----|---|---|---|---|---|---|---|
| Conditional Media | 0  | 2 | 3 | 4 | 5 | 6 | 7 | 8 |
| HUVEC Media       | 10 | 8 | 7 | 6 | 5 | 4 | 3 | 2 |

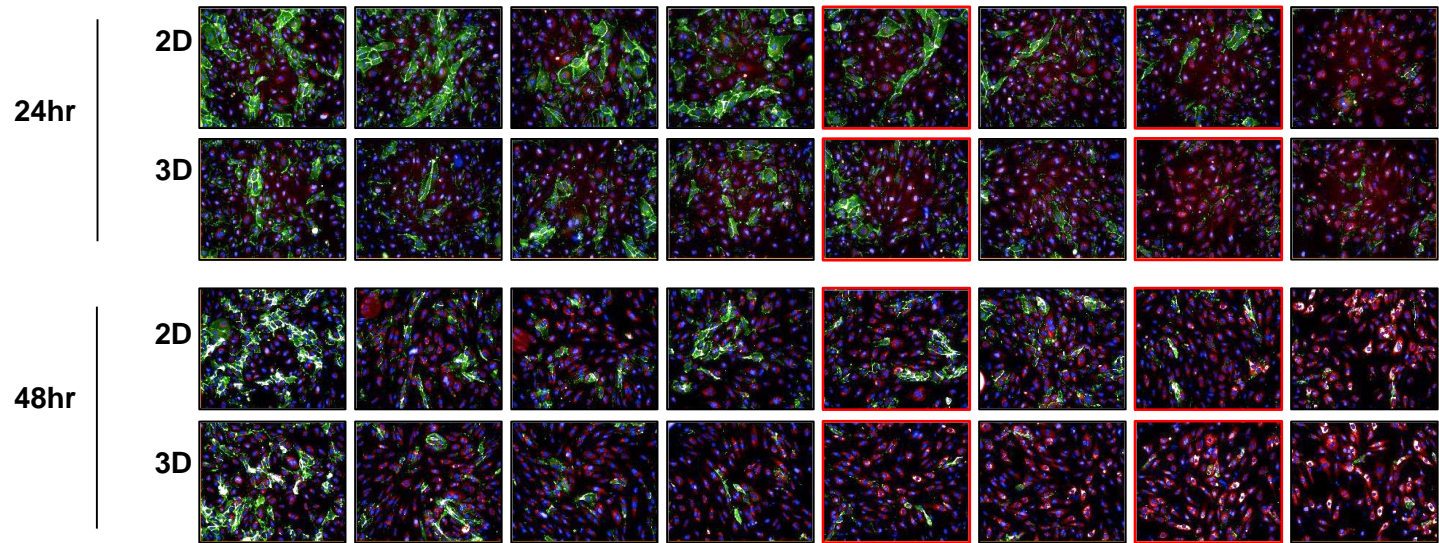

# Supplementary Figure 2

**A.**

**Human Growth Factor Antibody Array**

Each antibody is spotted in duplicate vertically

|   | A       | B             | C              | D              | E              | F               | G              | H       | I       | J       | K     | L      |
|---|---------|---------------|----------------|----------------|----------------|-----------------|----------------|---------|---------|---------|-------|--------|
| 1 | POS     | POS           | NEG            | NEG            | AR             | b-FGF           | $\beta$ -NGF   | EGF     | EGFR    | FGF-4   | FGF-6 | FGF-7  |
| 2 |         |               |                |                |                |                 |                |         |         |         |       | (KGF)  |
| 3 | GCSF    | GDNF          | GM-CSF         | HB-EGF         | HGF            | IGFBP-1         | IGFBP-2        | IGFBP-3 | IGFBP-4 | IGFBP-6 | IGF-1 | IGF-1R |
| 4 |         |               |                |                |                |                 |                |         |         |         |       |        |
| 5 | IGF-2   | M-CSF         | M-CSFR         | NT-3           | NT-4           | PDGFR- $\alpha$ | PDGFR- $\beta$ | PDGF-AA | PDGF-AB | PDGF-BB | PLGF  | SCF    |
| 6 |         |               |                |                |                |                 |                |         |         |         |       |        |
| 7 | SCFR    | TGF- $\alpha$ | TGF- $\beta$ 1 | TGF- $\beta$ 2 | TGF- $\beta$ 3 | VEGF-A          | VEGFR2         | VEGFR3  | VEGF-D  | BLANK   | BLANK | POS    |
| 8 | (CD117) |               |                |                |                |                 |                |         |         |         |       |        |

**B.**

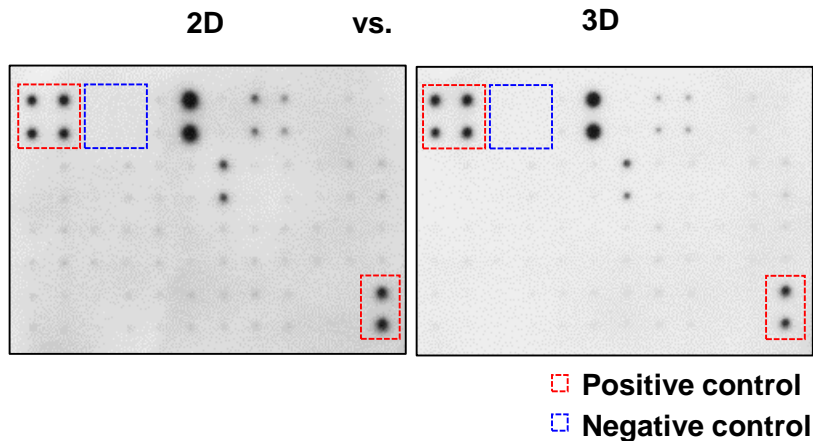

**C.**

**NCI-H460 cells + HUVEC cells**

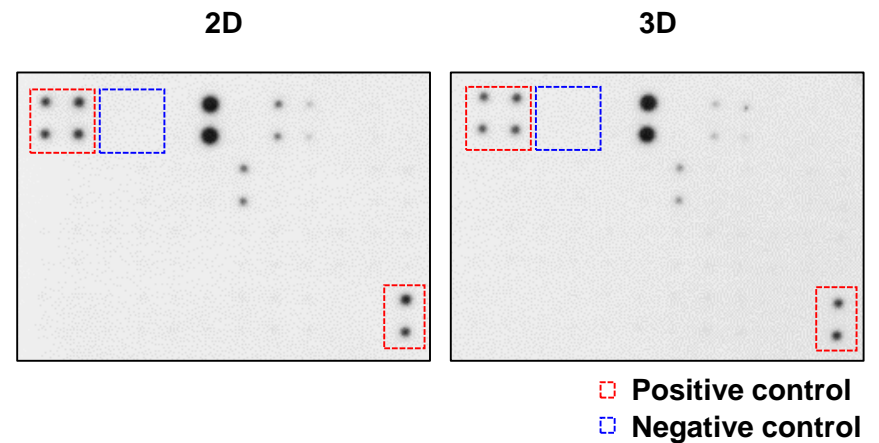

# Supplementary Figure 3

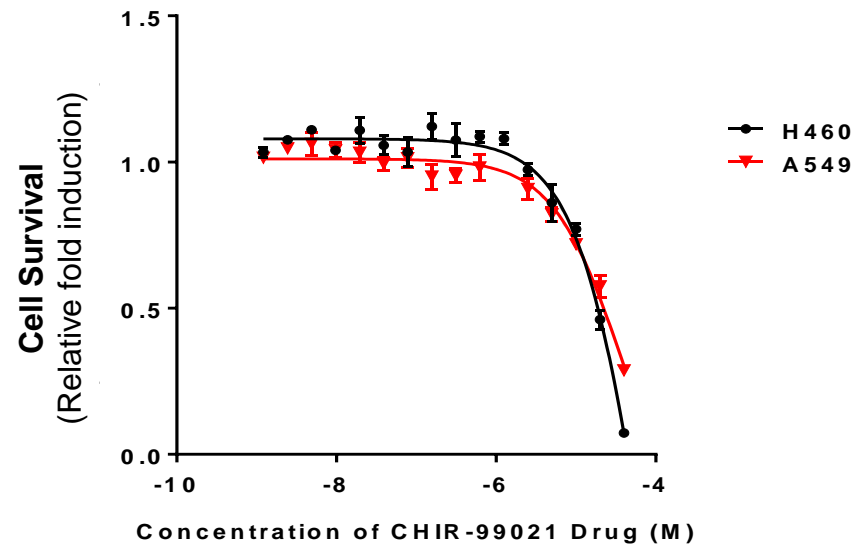

Supplement: 13046_2019_1050_MOESM1_ESM.pdf [file 13046_2019_1050_MOESM1_ESM.pdf]
